# Supplementary material for: Global burden of lower respiratory infections during the last three decades
Source: Frontiers journal article supplement (doi:10.3389/fpubh.2022.1028525), 2023-01-09

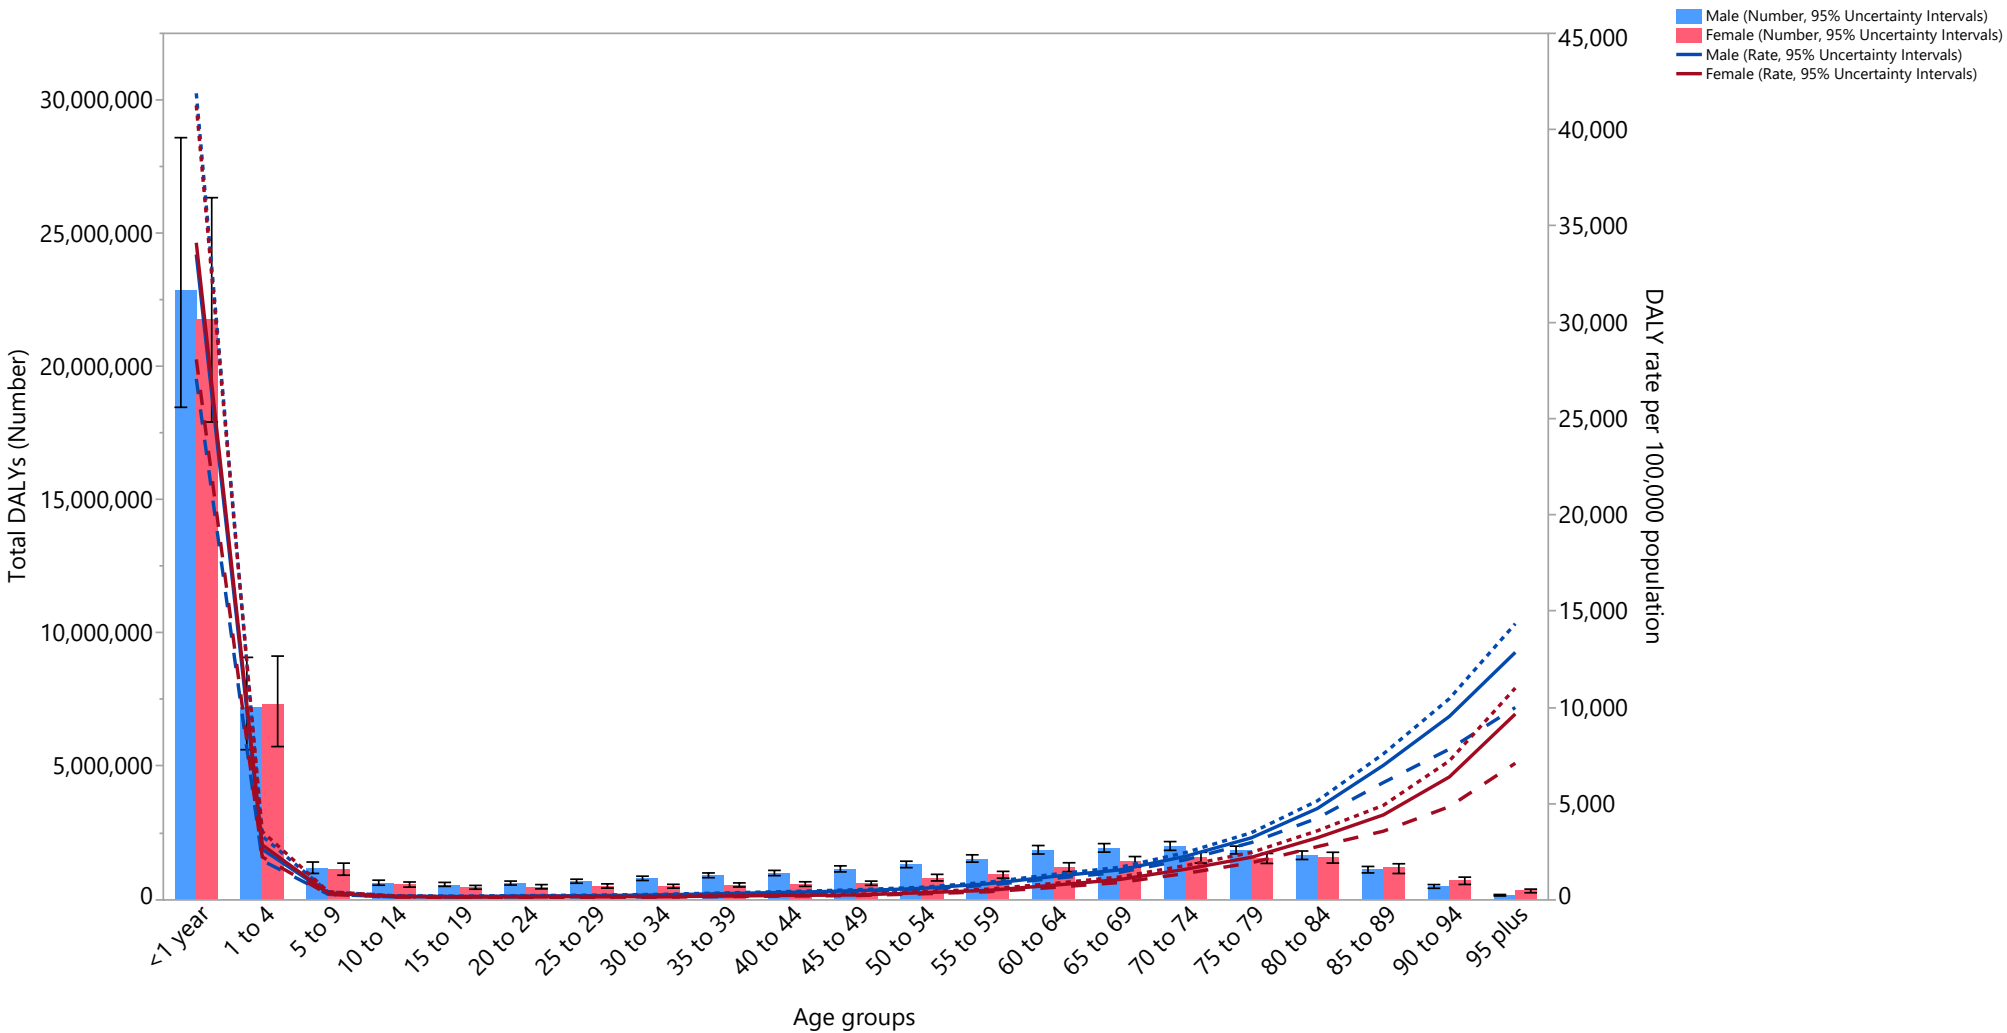

Supplement: Image_11.PDF [file Image_11.PDF]
